# Supplementary material for: Impact of sex and sex hormones on pathophysiology and progression of aortic stenosis in a murine model
Source: PubMed Central journal article supplement (PMC9419154; doi:10.14814/phy2.15433), 2022-08-27

## Online supplement for Impact of sex and sex hormones on pathophysiology and progression of aortic stenosis in a murine model

### Hormones measurement:

Before sacrifice, blood samples were obtained from all mice. Testosterone was measured in intact males and in castrated males supplemented by testosterone. 17 $\beta$ -estradiol was measured in intact females and ovariectomized females supplemented by 17 $\beta$ -estradiol.

The level of hormones was comparable between intact animals and supplemented animals:

Table: Blood level of testosterone and 17 $\beta$ -estradiol

|                               | IM              | CMT             | IF              | OFE             | p-value |
|-------------------------------|-----------------|-----------------|-----------------|-----------------|---------|
| Testosterone (ng/ml)          | 2.65 $\pm$ 1.38 | 2.12 $\pm$ 0.89 | -               | -               | 0.42    |
| 17 $\beta$ -estradiol (pg/ml) | -               | -               | 5.34 $\pm$ 2.50 | 5.10 $\pm$ 3.70 | 0.88    |

**Figure S1: Echocardiographic evaluation of LV function**

**Panels A and B** show the cardiac index and **Panels C and D** the fractional shortening at 12 and 36 weeks in male (**Panel A and C**) and female (**Panel B and D**) mice

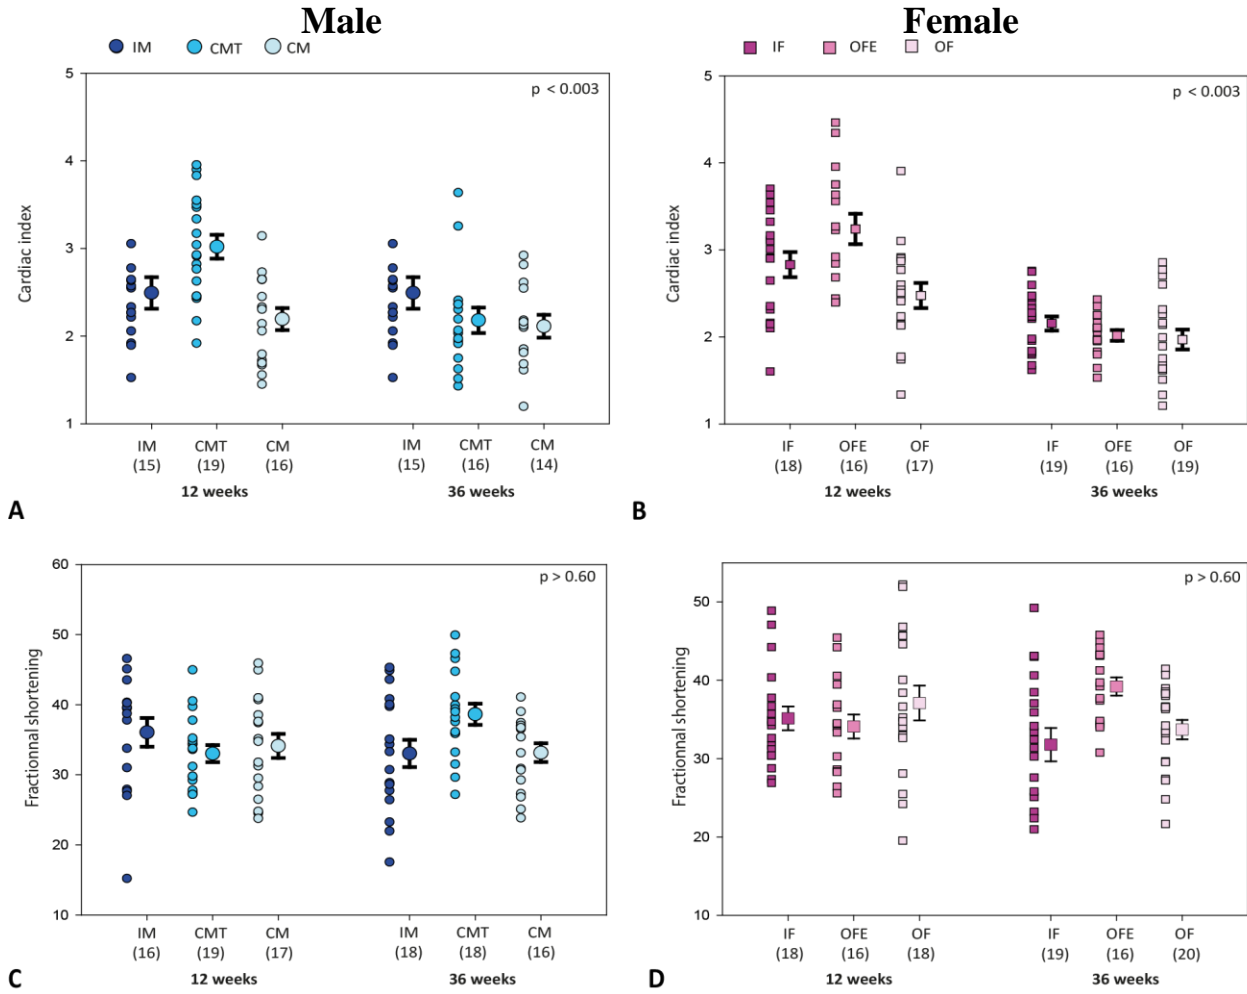

Figure S2: Digital droplet PCR results for gene expression assays of aortic valves RNA samples from each group, at 12 and 36 weeks

Panel A shows Bone morphogenetic protein 2 (BMP2), Panel B B-cell lymphoma 2 (BCL2), Panel C Caspase 3 and panel D bone gamma-carboxyglutamate protein (BGLAP) genes

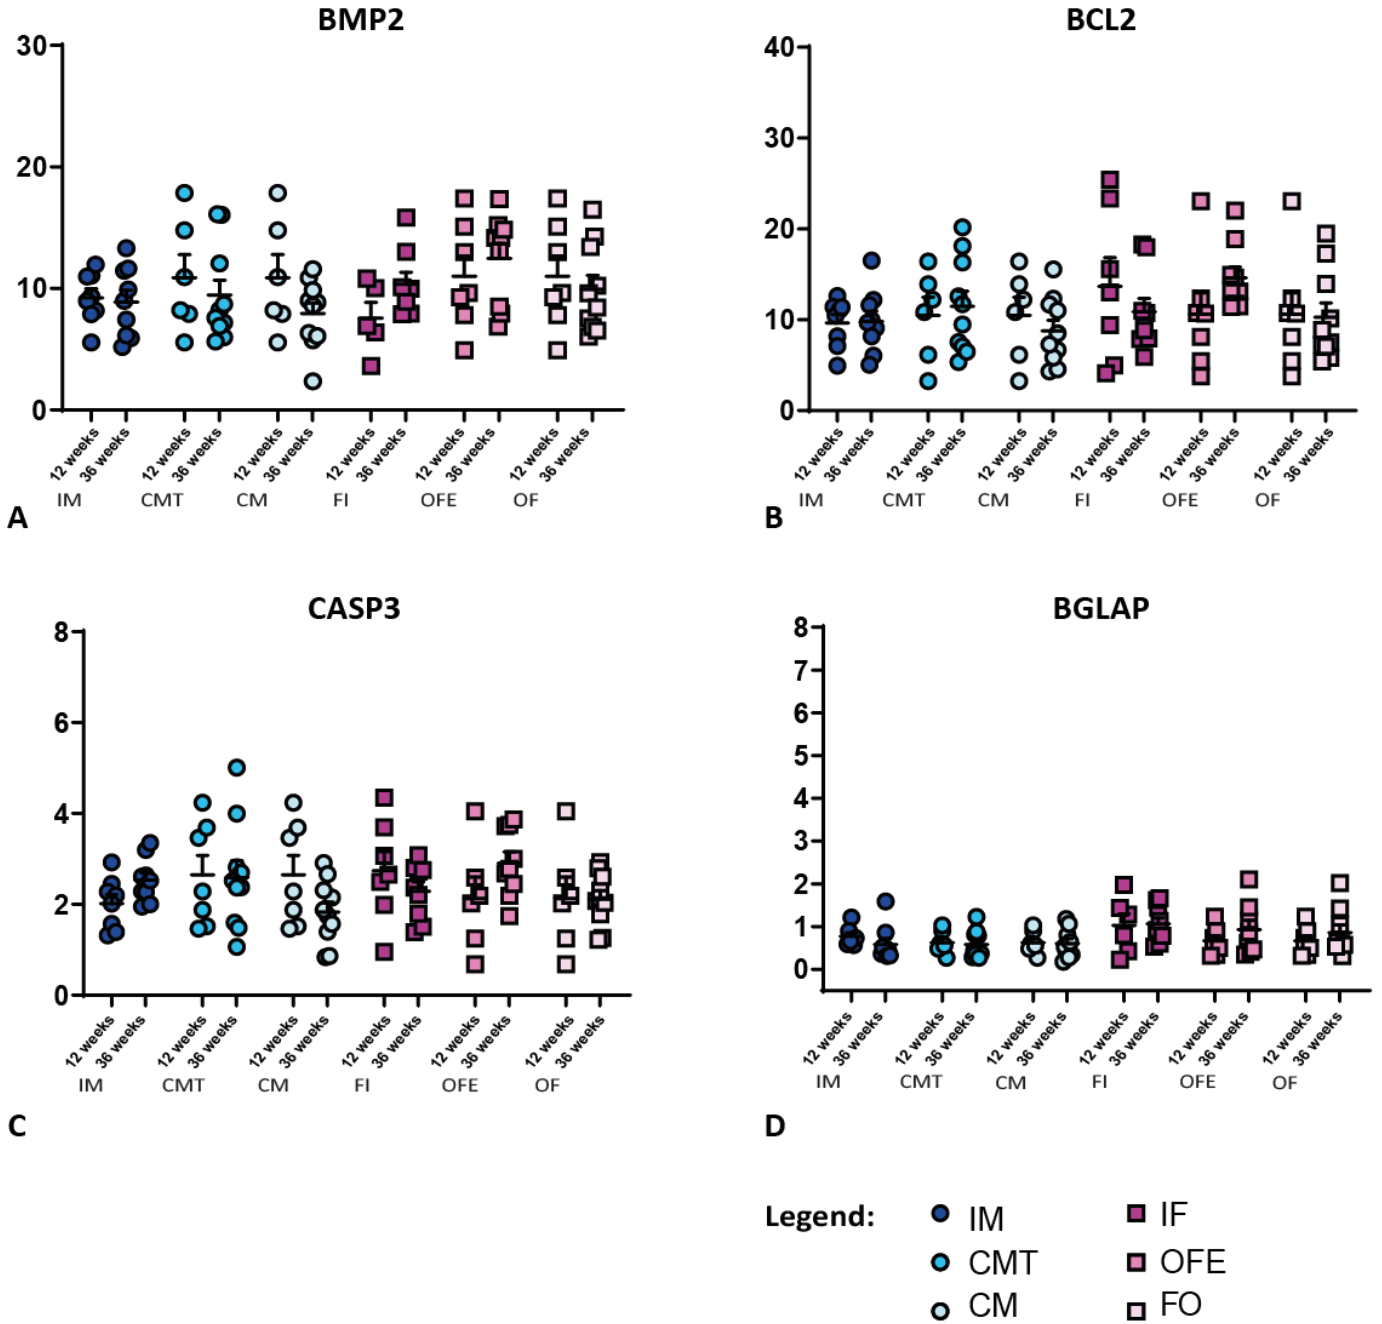

Supplement: PHY2-10-e15433-s001.pdf [file PHY2-10-e15433-s001.pdf]
